# Supplementary material for: Genomics and Virulence of Fonsecaea pugnacius, Agent of Disseminated Chromoblastomycosis
Source: Front Genet. 2020 Aug 4;11:822. doi: 10.3389/fgene.2020.00822 (PMC7417343; doi:10.3389/fgene.2020.00822)
Supplement: Supplementary file 3 [file Table_3.XLSX]

## Sheet: Sheet1
CAZY
Species	AA1	AA2	AA3	AA4	AA5	AA6	AA7	AA8	AA9	AA11	AA12	CBM1	CBM12	CBM13	CBM16	CBM18	CBM20	CBM21	CBM27	CBM35	CBM48	CBM50	CBM52	CBM80	CE1	CE2	CE3	CE4	CE5	CE7	CE8	CE9	CE10	CE12	CE14	CE15	CE16	GH1	GH2	GH3	GH5_5	GH5_9	GH5_12	GH5_15	GH5_22	GH5_23	GH5_24	GH5_31	GH5_32
Cladophialophora bantiana	17	6	81	10	6	2	25	3	1	2	1	0	0	1	1	0	0	1	0	0	0	2	0	1	43	1	1	9	0	11	0	28	80	2	1	0	1	2	6	9	0	2	1	0	3	0	1	2	0
Exophiala dermatitidis	14	3	36	6	8	1	6	0	2	2	1	1	0	0	0	0	0	1	0	0	1	1	0	0	27	0	1	6	1	7	1	9	40	1	1	0	1	2	2	8	1	2	1	0	1	0	0	0	0
Fonsecaea pugnacius	15	4	41	7	5	1	15	2	0	2	1	1	0	1	0	0	0	0	0	1	1	1	0	0	34	1	0	10	2	5	0	23	65	2	1	1	1	0	4	5	0	1	0	0	0	0	1	1	1
Fonsecaea monophora	14	3	36	6	8	1	6	0	2	2	1	1	0	0	0	0	0	1	0	0	1	1	0	0	27	0	1	6	1	7	1	9	40	1	1	0	1	2	2	8	1	2	1	0	1	0	0	0	0
Rhinocladiella mackenziei	14	3	48	6	1	2	23	1	2	3	1	0	1	0	0	0	0	1	1	0	1	0	0	0	41	0	0	4	0	8	0	22	64	1	1	0	1	2	4	6	0	2	1	1	2	1	1	1	0
Verruconis gallopava	14	5	38	3	6	1	17	2	2	6	1	1	1	2	0	1	1	3	0	0	0	1	1	0	34	1	6	7	6	2	1	17	43	7	1	0	3	1	3	9	1	3	2	0	0	0	1	0	0
MEROPS
Species	P01	I02	I04	I09	I17	I32	I43	I51	T01	T02	T03	T05	A01	A02	A03	A11	A22	A28	A31	A33	C01	C02	C12	C13	C14	C15	C19	C26	C27	C39	C44	C45	C48	C53	C54	C56	C59	C65	C98	M01	M03	M06	M10	M12	M13	M14	M16	M18	M19
Cladophialophora bantiana	0	0	1	3	1	2	1	5	15	2	3	1	12	1	0	3	1	1	1	0	2	3	6	2	7	0	13	7	0	2	7	2	2	3	2	6	0	2	0	10	2	0	2	3	1	1	6	3	3
Exophiala dermatitidis	0	1	0	3	1	2	1	2	15	2	2	1	8	2	0	4	1	0	1	0	2	2	6	2	2	0	14	7	0	0	7	3	2	3	3	3	0	4	0	6	2	0	1	3	1	1	6	2	3
Fonsecaea pugnacius	0	1	0	3	1	2	1	6	16	2	2	1	10	4	0	5	0	0	2	0	1	3	8	3	1	0	10	7	0	1	8	4	1	6	1	3	0	2	0	13	2	0	1	3	1	1	5	3	2
Fonsecaea monophora	0	0	0	1	1	2	1	5	16	2	2	1	12	4	0	3	1	1	1	1	1	3	5	2	2	1	13	7	0	0	7	4	3	4	2	5	1	1	0	8	2	0	2	3	1	1	6	3	3
Rhinocladiella mackenziei	0	1	0	3	1	2	1	7	15	2	2	1	9	1	0	6	1	1	1	1	2	3	6	2	15	0	15	7	0	1	8	3	3	4	2	4	0	2	0	7	2	0	1	3	1	1	6	2	4
Verruconis gallopava	1	0	0	3	0	3	1	7	15	2	2	1	15	0	0	4	1	1	3	0	2	2	7	2	3	1	17	8	1	1	14	2	2	5	3	6	0	2	1	4	2	1	4	6	2	1	6	3	1
[truncated: 111 more columns]
